# Supplementary material for: Emission inventory of PFASs and other fluorinated organic substances for the fluoropolymer production industry in Europe
Source: Royal Society of Chemistry journal article supplement (doi:10.1039/d3em00426k), 2023-12-20
Supplement: d3em00426k1.xlsx [file d3em00426k1.xlsx]

## Sheet: Sheet1
Abbreviation	Name	Formula	CAS	GWP (AR5)	ODP (Montreal Protocol)	PFAS	E-PRTR	Use	Process	Class	Synonyms
1H-PFHx	Trideca-1,1,1,2,2,3,3,4,4,5,5,6,6-fluorohexane	C6HF13	355-37-3	2000	-	Yes	No	Polymerization medium (ETFE)	Polymerization	Hydrofluorocarbons
6:2 FTS	6:2 fluorotelomersulfonic acid	C8H5F13O3S	34455-29-3	-	-	Yes	No	Fluorosurfactant	Polymerization	Fluorotelomer sulfonic acids
ADV	1-Propene, 1,1,2,3,3,3-hexafluoro-,telomer with chlorotrifluoroethene, oxidized, reduced, hydrolyzed	Cl(C3F6O)n(C2F4O)mCF2COOH	330809-92-2	-	-	Yes	No	Fluorosurfactant	Polymerization	Perfluoroether carboxylic acids
BPAF	Bisphenol AF	C15H10F6O2	1478-61-1	-	-	Yes	No	Curing agent	Fluoroelastomer curing	Bisphenols
BTFM	Bromotrifluoromethane	CBrF3	75-63-8	6900	10	No	Yes	Fire surpression/feedstock substance		Halon	Halon-1301
cC6O4	(difluoro{[2,2,4,5-tetrafluoro-5-(trifluoromethoxy)-1,3-dioxolan-4-yl]oxy}acetic acid)	C6HF9O6	1190931-27-1	-	-	Yes	No	Fluorosurfactant	Polymerization	Perfluoroether carboxylic acids
CTFE	Chlorotrifluoroethylene	C2ClF3	79-38-9	unknown	unknown	Yes	No	Monomer	Polymerization	Fluoropolymers
DIOFB	1,4-diiodoperfluorobutane	C4F8I2	375-50-8	-	-	Yes	No	Chain transfer agent	Polymerization	Iodinated perfluorocarbons
DIOFE	1,1,2,2-tetrafluoro-1,2-diiodoethane	C2F4I2	354-65-4	-	-	No	No	Chain transfer agent	Polymerization	Iodinated perfluorocarbons
DIOFH	1,6-diiodoperfluorohexane	C6F12I2	375-80-4	-	-	Yes	No	Chain transfer agent	Polymerization	Iodinated perfluorocarbons
DONA	Perfluoro-4,8-dioxa-3H-nonanoic acid	C7H2F12O4	919005-14-4	-	-	Yes	No	Fluorosurfactant	Polymerization	Perfluoroether carboxylic acids
E1	Heptafluoropropyl 1,2,2,2-tetrafluoroethyl ether	C5HF11O	3330-15-2	unknown	-	Yes	No	Byproduct	Polymerization	Hydrofluoroethers
ECTFE	Ethylene chlorotrifluoroethylene	(C2H4)n(C2ClF3)m	25101-45-5	-	-	Yes	No	Fluoropolymer	Polymerization	Fluoropolymers
EEA	Perfluoro(2-ethoxy-2-fluoroethoxy)-acetic acid	C6HF11O4	908020-52-0	-	-	Yes	No	Fluorosurfactant	Polymerization	Perfluoroether carboxylic acids
ETFE	Ethylene tetrafluoroethylene	(C2H4)n(C2F4)m	25038-71-5	-	-	Yes	No	Fluoropolymer	Polymerization	Fluoropolymers
Ether A	2-[Difluoro(methoxy)methyl]-1,1,1,3,3,3-hexafluoropropane	C5H4F8O	382-26-3	unknown	-	Yes	No	Byproduct	TFE & HFP production	Hydrofluoroethers
Ether B	1-Methoxy(perfluoro-2-methyl-1-propene)	C5H3F7O	360-53-2	unknown	-	Yes	No	Byproduct	TFE & HFP production	Hydrofluoroethers
FC-72	Perfluorohexane	C6F14	355-42-0	9300	-	Yes	Yes	Cooling		Perfluorocarbons
FEP	Fluorinated ethylene propylene	(C2F4)n(C3F6)m	25067-11-2	-	-	Yes	No	Fluoropolymer	Polymerization	Fluoropolymers
FEPM	Tetrafluoroethylene propylene	(C2F4)n(C3H6)m	64706-30-5	-	-	Yes	No	Fluoropolymer	Polymerization	Fluoropolymers
FKM	Fluorine Kautschuk Material	(C2H2F2)n(C3F6)m	64706-30-5	-	-	Yes	No	Fluoropolymer	Polymerization	Fluoropolymers
HCFC-124	Tetrafluorochloroethane	C2HClF4	359-28-4	527	0.01-0.05	Yes	Yes	Coolant	Cooling	Hydrochlorofluorocarbons
HCFC-142b	1-Chloro-1,1-difluoroethane	C2H3ClF2	75-68-3	1980		No	Yes	Intermediate	Monomer production	Hydrochlorofluorocarbons
HCFC-21	Dichlorofluoromethane	CHCl2F	75-43-4	148	0.055	No	Yes	Byproduct	HCFC-22 production	Hydrochlorofluorocarbons
HCFC-22	Chlorodifluoromethane	CHClF2	75-45-6	1760	0.02	No	Yes	Feedstock substance	Monomer production	Hydrochlorofluorocarbons
HFC-125	Pentafluoroethane	C2HF5	354-33-6	3170	-	Yes	Yes	Coolant	Cooling	Hydrofluorocarbons
HFC-134a	1,1,2,2-tetrafluoroethane	C2HF4	811-97-2	1300	-	No	Yes	Coolant	Cooling	Hydrofluorocarbons
HFC-141b	1,1-Dichloro-1-fluoroethane	C2H3Cl2F	1717-00-6	0.12	782	No	Yes	Feedstock substance	Monomer production	Hydrochlorofluorocarbons
HFC-143a	1,1,1-Trifluoroethane	C2H3F3	420-46-2	4800		Yes	Yes	Intermediate	Monomer production	Hydrofluorocarbons	R-143a
HFC-152a	1,1-Difluoroethane	C2H5F2	75-37-6	138		No	Yes	Intermediate	Monomer production	Hydrofluorocarbons
HFC-23	Trifluoromethane	CHF3	75-46-7	12400	-	No	Yes	Byproduct	HCFC-22 production	Hydrofluorocarbons
HFC-32	Difluoromethane	CH2F2	75-10-5	677		No	Yes	Coolant	Cooling	Hydrofluorocarbons
HFC-365mfc	1,1,1,3,3-pentafluorobutane	C4H5F5	406-58-6	804	-	Yes	Yes	Blowing agent		Hydrofluorocarbons
HFC-4310mee	1,1,1,2,3,4,4,5,5,5-Decafluoropentane	C5H2F10	138495-42-8	1640	-	Yes	Yes	Polymerization medium	Granular PTFE production	Hydrofluorocarbons	Vertrel XF
HFP	Hexafluoropropylene	C3F6	116-15-4		-	Yes	No	Monomer	Polymerization	Fluoroalkenes
HFPO	Hexafluoropropylene oxide	C3F6O	428-59-1	6200	-	Yes	No	Feedstock substance	Monomer production	Perfluoroepoxide
HFPO-DA	Hexafluoropropylene oxide dimer acid	C6HF11O3	13252-13-6	-	-	Yes	No	Fluorosurfactant	Polymerization	Perfluoroether carboxylic acids
MV31	2-(3-trifluoromethoxy-1,1,2,2,3,3-hexafluoropropoxy)-2,3,3,3-tetrafluoropropanoic acid	C7HF13O4	496805-64-2	-	-	Yes	No	Fluorosurfactant	Polymerization	Perfluoroether carboxylic acids
PCTFE	Polychlorotrifluoroethylene	(C2ClF3)n	9002-83-9	-	-	Yes	No	Fluoropolymer	Polymerization	Fluoropolymers
PEVE	Perfluoroethyl vinyl ether	C4F8O	10493-43-3		-	Yes	No	Monomer	Polymerization	Fluoroethers
PFA	Perfluoroalkoxyalkane	(C2F4)n (C3F6O)m	26655-00-5	-	-	Yes	No	Fluoropolymer	Polymerization	Fluoropolymers
PFAC	Perfluoroallylchloride	C3ClF5	2804-50-4	unknown	unknown	Yes	No	Byproduct	HCFC-22 pyrolysis
PFBA	Perfluorobutanoic acid	C4HF7O2	375-22-4	-	-	Yes	No	Byproduct	Polymerization	Perfluoroalkyl acids
PFBE	Perfluorobutyl ethylene	C6H3F9	19430-93-4		-	Yes	No	Monomer	Polymerization	Hydrofluoroalkenes
PFBS	Perfluorobutanesulfonic acid	C4HF9O3S	19430-93-4	-	-	Yes	No			Perfluoroalkyl acids
PFC-116	Hexafluoroethane	C2F6	76-16-4	11100	-	Yes	Yes			Perfluorocarbons
PFC-218	Octafluoropropane	C3F8	76-19-7	8900		Yes	Yes			Perfluorocarbons
PFC-318	Perfluorocyclobutane	C4F8	115-25-3	9540	-	Yes	Yes	Byproduct	HCFC-22 pyrolysis	Perfluorocarbons
PFDA	Perfluorodecanoic acid	C10HF19O2	335-76-2	-	-	Yes	No	Byproduct	Polymerization	Perfluoroalkyl acids
PFDoDA	Perfluorododecanoic acid	C12HF23O2	307-55-1	-	-	Yes	No	Byproduct	Polymerization	Perfluoroalkyl acids
PFHpA	Perfluoroheptanoic acid	C7HF13O2	75-85-93	-	-	Yes	No	Byproduct	Polymerization	Perfluoroalkyl acids
PFHxA	Perfluorohexanoic acid	C6HF11O2	307-24-4	-	-	Yes	No	Fluorosurfactant/Byproduct	Polymerization	Perfluoroalkyl acids
PFHxDA	Perfluorohexadecanoic acid	C16HF31O2	67905-19-5	-	-	Yes	No	Byproduct	Polymerization	Perfluoroalkyl acids
PFHxS	Perfluorohexanesulfonic acid	C6HF13O3S	355-46-4	-	-	Yes	No			Perfluoroalkyl acids
PFIB	Perfluoroisobutylene	C4F8	382-21-8	-	-	Yes	No	Byproduct	HCFC-22 pyrolysis	Fluoroalkenes
PFNA	Perfluorononanoic acid	C9HF17O2	375-95-1	-	-	Yes	No	Fluorosurfactant/Byproduct	Polymerization	Perfluoroalkyl acids
PFOA	Perfluorooctanoic acid	C8HF15O2	335-67-1	-	-	Yes	No	Fluorosurfactant/Byproduct	Polymerization	Perfluoroalkyl acids
PFOcDA	Perfluorooctadecanoic acid	C18HF35O2	16517-11-6	-	-	Yes	No	Byproduct	Polymerization	Perfluoroalkyl acids
PFOS	Perfluorooctanesulfonic acid	C8HF17O3S	1763-23-1	-	-	Yes	No			Perfluoroalkyl acids
PFPA	Perfluoropropionic acid	C3HF5O2	422-64-0	-	-	Yes	No	Byproduct	Polymerization	Perfluoroalkyl acids
PFPE	Perfluoropolyether	C3F7O(C3F6O)nC2F5	60164-51-4	-	-	Yes	No	Fluoropolymer	Polymerization	Fluoropolymers
PFPeA	Perfluoropentanoic acid	C5HF9O2	2706-90-3	-	-	Yes	No	Byproduct	Polymerization	Perfluoroalkyl acids
PFTriDA	Perfluorotridecanoic acid	C13HF25O2	72629-94-8	-	-	Yes	No	Fluorosurfactant/Byproduct	Polymerization	Perfluoroalkyl acids
PFUnDA	Perfluoroundecanoic acid	C11HF21O2	2058-94-8	-	-	Yes	No	Fluorosurfactant/Byproduct	Polymerization	Perfluoroalkyl acids
PMVE	Perfluoromethyl vinyl ether	C3F6O	1187-93-5	-	-	Yes	No	Monomer	Polymerization	Fluoroethers
PPVE	Perfluoropropyl vinyl ether	C5F10O	1623-05-8		-	Yes	No	Monomer	Polymerization	Fluoroethers
PTFE	Polytetrafluoroethylene	(C2F4)n	9002-84-0	-	-	Yes	No	Fluoropolymer	Polymerization	Fluoropolymers
PVDF	Polyvinylidene fluoride	(CH2CF2)n	24937-79-9	-	-	Yes	No	Fluoropolymer	Polymerization	Fluoropolymers
TFA	Trifluoroacetic acid	C2HF3O2	76-05-1	-	-	Yes	No	Byproduct	Polymerization	Perfluoroalkyl acids
TFE	Tetrafluoroethylene	C2F4	116-14-3		-	No	No	Monomer	Polymerization	Fluoroalkenes
TFMS	Trifluoromethylsulfonic acid	CF3O3S	1493-13-6	-	-	Yes	No			Perfluoroalkyl acids
THV	Tetrafluoroethylene hexafluoropropylene and vinylidene fluoride	(C2F4)n (C3F6)m (CH2CF2)l	​25190-89-0	-	-	Yes	No	Fluoropolymer	Polymerization	Fluoropolymers
TrFE	Trifluoroethylene	C2HF3	359-11-5		-	No	No	Monomer	Polymerization	Fluoroalkenes
VDF	Vinylidene fluoride	C2H2F2	75-38-7		-	No	No	Monomer	Polymerization	Fluoroalkenes
VEFS	Perfluoro-2-(vinyloxy)ethane-1-sulfonic acid	C4F7O3S	29514-94-1	-	-	Yes	No	Monomer/Fluorosurfactant	Polymerization	Fluoroethers
