# Supplementary material for: Emission inventory of PFASs and other fluorinated organic substances for the fluoropolymer production industry in Europe
Source: Royal Society of Chemistry journal article supplement (doi:10.1039/d3em00426k), 2023-12-20
Supplement: d3em00426k2.pdf [file d3em00426k2.pdf]

## Supplementary information

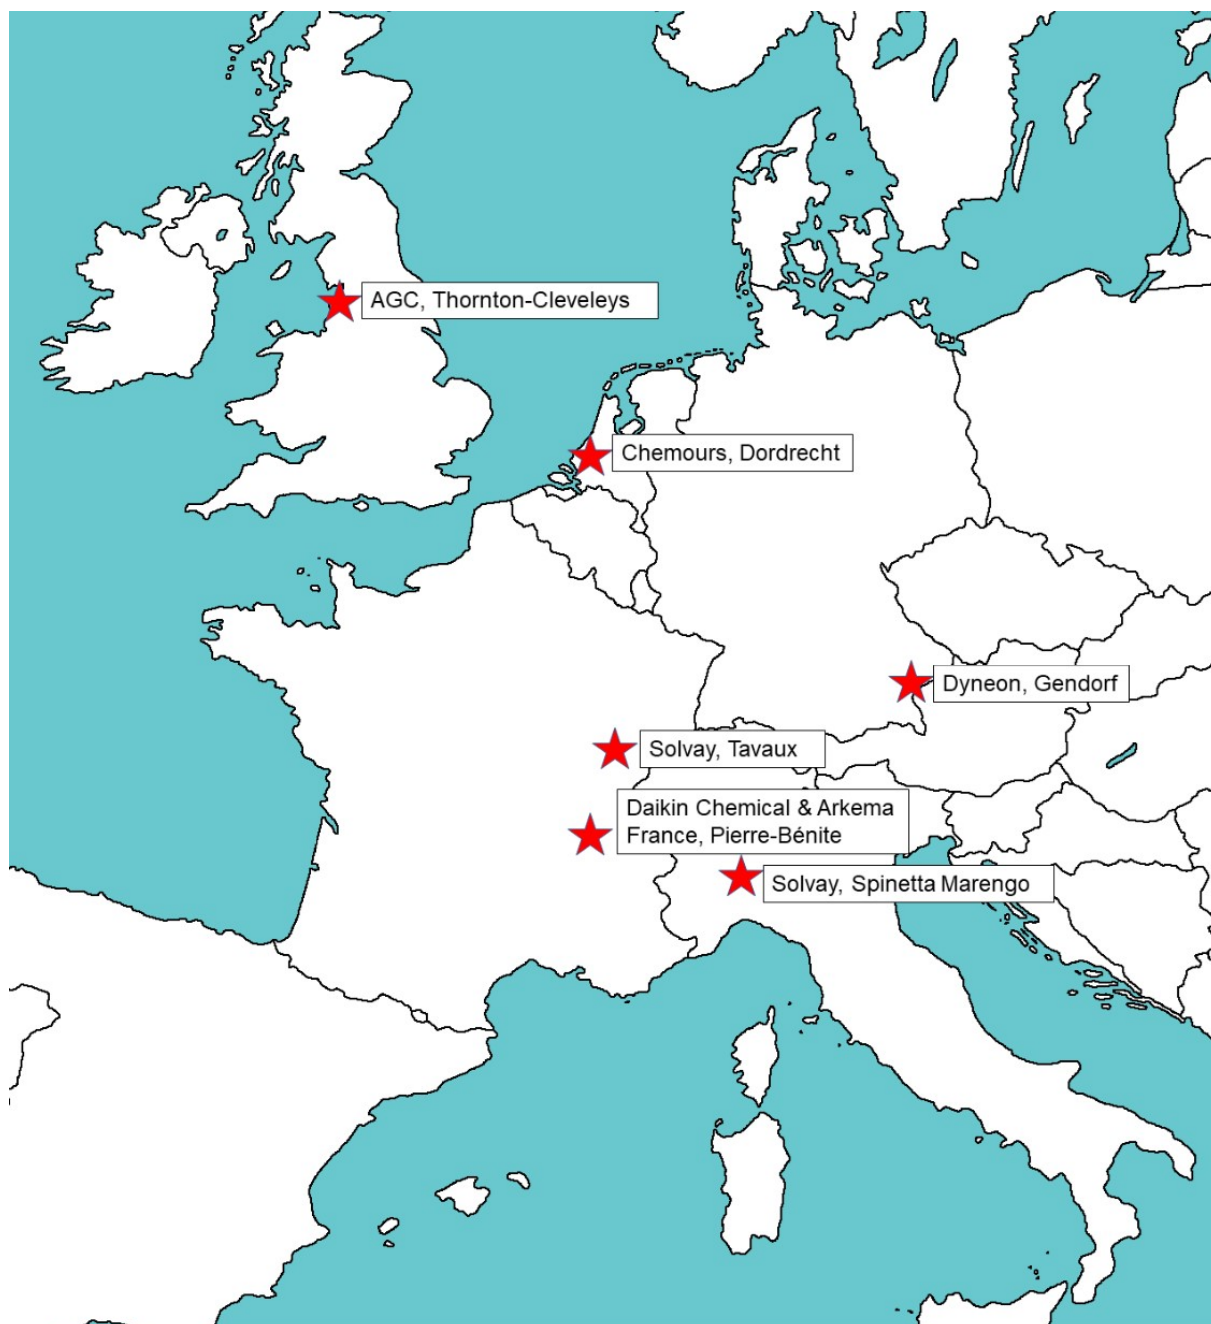

Figure S1. Fluoropolymer production sites in Europe.

Table S1. Overview of fluorosurfactants used in fluoropolymer production in Europe.

| Full chemical name                                                                                    | Formula                                                                                                                                              | Synonyms                                                                    | Users in EU                    |
|-------------------------------------------------------------------------------------------------------|------------------------------------------------------------------------------------------------------------------------------------------------------|-----------------------------------------------------------------------------|--------------------------------|
| 2,2-difluoro-2-[1,1,2,2-tetrafluoro-2-(1,1,2,2,2-pentafluoroethoxy)ethoxy]acetic acid                 | C <sub>6</sub> HF <sub>11</sub> O <sub>4</sub>                                                                                                       | EEA, perfluoro-3,6-dioxaoctanoic acid, PFO2OA, SAA-1000*, Asahi's Product   | AGC                            |
| 2,3,3,3-Tetrafluoro-2-(heptafluoropropoxy)propanoic acid                                              | C <sub>6</sub> HF <sub>11</sub> O <sub>3</sub>                                                                                                       | Hexafluoropropylene oxide dimer acid (HFPO-DA), GenX*, FRD-903, FRD-902*    | Chemours                       |
| 2,2,3-Trifluoro-3-(1,1,2,2,3,3-hexafluoro-3-(trifluoromethoxy)propoxy)propanoic acid                  | C <sub>7</sub> H <sub>2</sub> F <sub>12</sub> O <sub>4</sub>                                                                                         | ADONA* 4,8-dioxahexafluoropropylperfluorononanoic acid                      | Dyneon (3M)                    |
| 2-(3-trifluoromethoxy-1,1,2,2,3,3-hexafluoropropoxy)-2,3,3,3-tetrafluoropropanoic acid                | C <sub>7</sub> HF <sub>13</sub> O <sub>4</sub>                                                                                                       | MV31                                                                        | Dyneon (3M)                    |
| (difluoro{[2,2,4,5-tetrafluoro-5-(trifluoromethoxy)-1,3-dioxolane-4-yl]oxy}acetic acid)               | C <sub>6</sub> HF <sub>9</sub> O <sub>6</sub>                                                                                                        | cC6O4, F-DIOX acid, C6O4 cyclic                                             | Solvay                         |
| 3,3,4,4,5,5,6,6,7,7,8,8,8-tridecafluorooctane-1-sulfonic acid                                         | C <sub>8</sub> H <sub>5</sub> F <sub>13</sub> O <sub>3</sub> S                                                                                       | 6:2 FTS, Capstone FS-17**, Capstone FS10                                    | Chemours, Arkema               |
| Undecafluorohexanoic acid                                                                             | C <sub>6</sub> HF <sub>11</sub> O <sub>2</sub>                                                                                                       | PFHxA, C6                                                                   | Daikin Chemical                |
| 1-Propene, 1,1,2,3,3,3-hexafluoro-, telomer with chlorotrifluoroethene, oxidized, reduced, hydrolyzed | Cl(C <sub>3</sub> F <sub>6</sub> O) <sub>n</sub> (C <sub>2</sub> F <sub>4</sub> O) <sub>m</sub> CF <sub>2</sub> COOH                                 | ADV*, Cl-PFPECAs, Fluorolink 7800 and 7850, Chloro-Galden, Solvay's product | Solvay                         |
| Pentadecafluorooctanoic acid                                                                          | C <sub>8</sub> HF <sub>15</sub> O <sub>2</sub>                                                                                                       | PFOA, C8, APFO* FC-143*                                                     | All manufacturers (phased out) |
| Heptadecafluorononanoic acid<br>Henicosfluoroundecanoic acid<br>Pentacosfluorotridecanoic acid        | C <sub>9</sub> HF <sub>17</sub> O <sub>2</sub><br>C <sub>11</sub> HF <sub>21</sub> O <sub>2</sub><br>C <sub>13</sub> HF <sub>25</sub> O <sub>2</sub> | Surflon S-111*                                                              | Arkema (phased out)            |

\*Refers to the ammonium salt(s) of this substance

\*\* Refers to the potassium salt of this substance

Table S2. Emissions of fluorinated gases (kg/yr) in the municipalities of Solvay-Solexis (France) from INERIS database.

| Tavaux/A-la-Ronce | 2004   | 2007   | 2012   |
|-------------------|--------|--------|--------|
| C3F8              | 0.1    | 0.0    | 0.0    |
| C6F14             | 17.5   | 0.0    | 0.0    |
| HFC-125           | 29.9   | 143.7  | 109.8  |
| HFC-134a          | 581.8  | 761.8  | 479.4  |
| HFC-142a          | 1302.4 | 1359.3 | 82.7   |
| HFC-152a          | 14.4   | 38.6   | 23.2   |
| HFC-227ea         | 256.7  | 288.6  | 334.2  |
| HFC-23            | 10.7   | 12.0   | 13.8   |
| HFC-32            | 4.4    | 12.8   | 30.4   |
| HFC-365mfc        | 2475.4 | 1373.4 | 24.3   |
| HFC-4310mee       | 15.7   | 20.4   | 4.2    |
| Sum               | 4708.9 | 4010.8 | 1102.0 |

Table S3. Emissions of fluorinated gases (kg/yr) in the municipality of Arkema-Daikin (France) from INERIS database.

| Pierre-Bénite | 2004   | 2007   | 2012  |
|---------------|--------|--------|-------|
| C3F8          | 0.147  | 0      | 0     |
| C6F14         | 4.009  | 0      | 0     |
| HFC-125       | 9835   | 5811   | 3015  |
| HFC-134a      | 13760  | 6190   | 6427  |
| HFC-143a      | 19170  | 10960  | 8094  |
| HFC-152a      | 29.22  | 60.68  | 46.07 |
| HFC-227ea     | 130.7  | 147.9  | 174.7 |
| HFC-23        | 26070  | 17700  | 5608  |
| HFC-32        | 5439   | 883.3  | 816.7 |
| HFC-365mfc    | 10.23  | 1380   | 1221  |
| HFC-4310mee   | 31.201 | 40.648 | 8.276 |
| SUM           | 74479  | 43173  | 25410 |

Table S4. Substances mentioned on the emission permits of European producers with substance specific information.

|                                            | AGC                                                                                 | Chemours                                                                                                                                                                                                                                                        | Solvay SP                                                                                                                                                                                                                              |
|--------------------------------------------|-------------------------------------------------------------------------------------|-----------------------------------------------------------------------------------------------------------------------------------------------------------------------------------------------------------------------------------------------------------------|----------------------------------------------------------------------------------------------------------------------------------------------------------------------------------------------------------------------------------------|
| Substances on emission permit PFAS in bold | TFE, <b>HFP</b> , TrFE, HCFC-22, HFC-23, <b>HFC-125</b> , <b>EEA-NH<sub>4</sub></b> | TFE, <b>HFP</b> , VDF, <b>PFC-318</b> , <b>PFIB</b> , HCFC-22, HFC-23, H(C)FCs, <b>PMVE</b> , <b>PPVE</b> , <b>PEVE</b> , <b>HFC4310-mee</b> , <b>E1</b> , <b>Ether A/B</b> , <b>PFAC</b> , <b>HFPO-DA</b> , <b>6:2 FTS</b> , <b>C4-C14 PFCAs</b> , <b>PFBS</b> | TFE, <b>HFP</b> , VDF, <b>PFIB</b> , <b>PFC-318</b> , <b>PFOA*</b> , HCFC-22, <b>PMVE</b> , <b>PPVE</b> , <b>DIOFE</b> , <b>DIOFB</b> , <b>DIOFH</b> , inert particulate fluoropolymers, <b>cC6O4**</b> , <b>ADV**</b> , <b>FSVE**</b> |

\*Currently phased out \*\*Mentioned in an addition to the original permit

Table S5. Overview of the different fluorinated organic substances, their uses and permitted and reported air emissions (t/yr) on emission permits of the European companies with substance specific information on the permit and from emission reports.

| Substance use                | Substance             | AGC            | Chemours | Solvay Specialty Polymers | Arkema-Daikin                                             |
|------------------------------|-----------------------|----------------|----------|---------------------------|-----------------------------------------------------------|
| Monomer                      | TFE                   | 12             | 8.9      | 7.5                       | Amount unknown                                            |
|                              | HFP                   | 5              | 19.1     | Amount unknown            | 12.18                                                     |
|                              | VDF                   | -              | 1.02     | Amount unknown            | Amount unknown                                            |
|                              | TrFE                  | 7              | -        | -                         | -                                                         |
| Monomer production           | HCFC-22               | 2.35           | 1.98     | Amount unknown            | Amount unknown                                            |
|                              | HFC-23                | 1.75           | 40.32    | -                         | 15.4                                                      |
|                              | HFC-32                | 0.35           | -*       | -                         |                                                           |
| Fluoroether monomers         | PPVE/PEVE             | -              | 0.139    | Amount unknown            | -                                                         |
|                              | PMVE                  | -              | 3.8      | Amount unknown            | -                                                         |
| By-product                   | PFIB                  | Amount unknown | 0.056    | Amount unknown            | Amount unknown                                            |
| Monomer production/byproduct | PFC-318               | Amount unknown | 2.53     | Amount unknown            | Amount unknown                                            |
| Chain transfer agents        | DIOFE                 | -              | -        | Amount unknown            | -                                                         |
|                              | DIOFB                 | -              | -        | Amount unknown            | -                                                         |
|                              | DIOFH                 | -              | -        | Amount unknown            | -                                                         |
| Coolant                      | HFC-125               | 0.35           | -*       | -                         | -                                                         |
| Various uses                 | (H)(C)FCs and Halons  | -**            | 54.231   | Amount unknown            | 34.9 (HCFCs)<br>29 (HFCs)<br>0.152 (CFCs)<br>0.889 (BTFM) |
| By-product                   | Ether A/B             | -              | 21       | -                         | -                                                         |
| By-product                   | PFAC                  | Amount unknown | 1.4      | Amount unknown            | Amount unknown                                            |
| Fluorinated solvent          | HFC-4310mee           | -              | 0.9      | -                         | -                                                         |
| Fluorinated solvent          | 1H-PFHx               | 30.9           |          |                           | -                                                         |
| Fluorosurfactants            | HFPO-DA               | -              | 0.004    | -                         | -                                                         |
|                              | 6:2 FTS               | -              | 0.002    | -                         | 0.01                                                      |
|                              | C4-C14 PFCAs and PFBS | Amount unknown | ~0.002   | Amount unknown            | 0.01                                                      |
|                              | EEA                   | <0.1           | -        | -                         | -                                                         |
|                              | cC6O4                 | -              | -        | Amount unknown            | -                                                         |
|                              | ADV                   | -              | -        | Amount unknown            | -                                                         |

\*Part of the H(C)FC category \*\*Mentioned individually

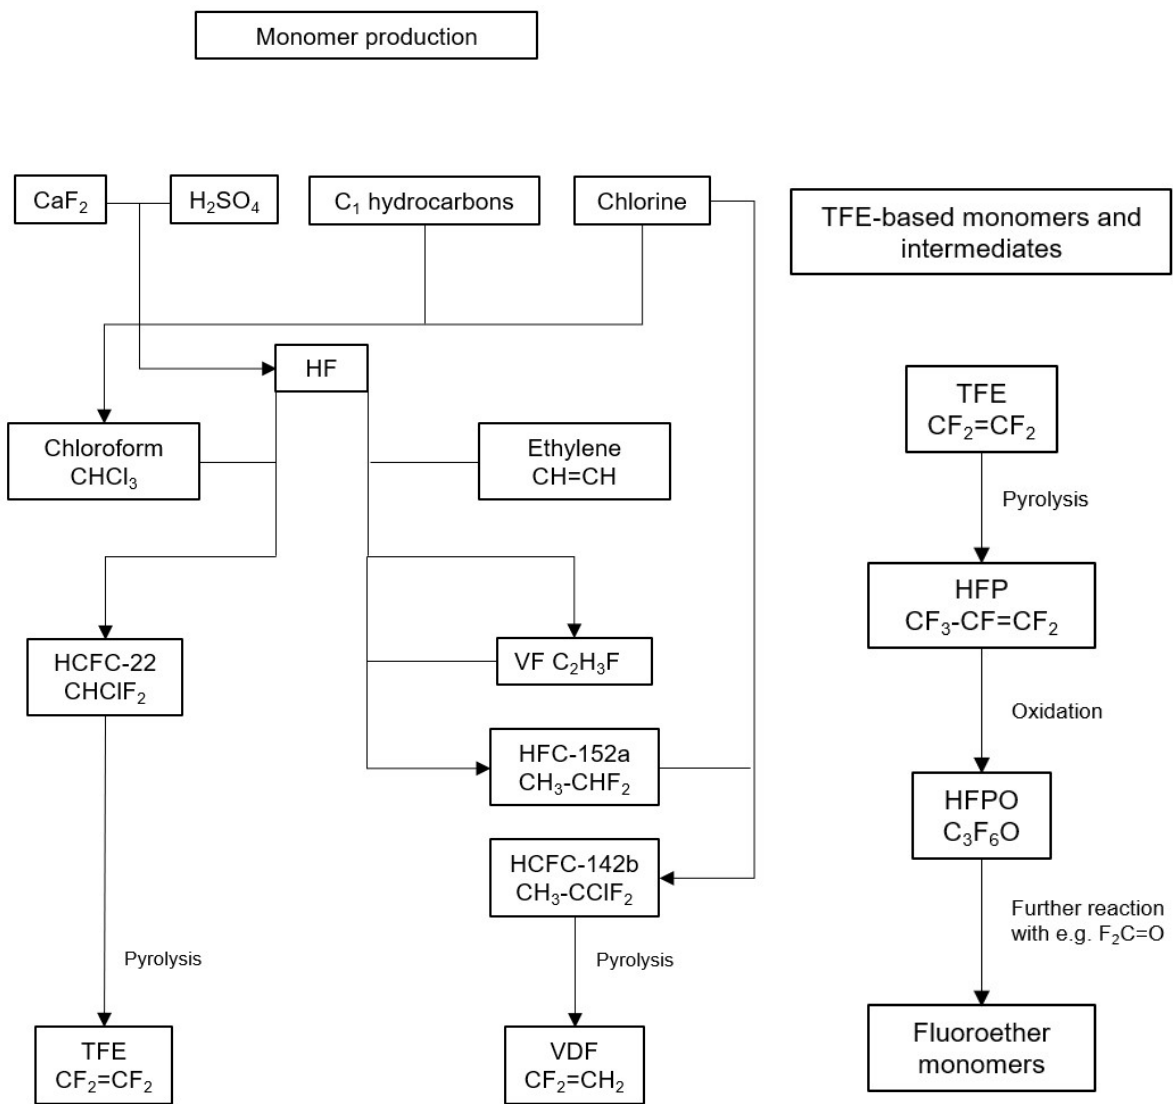

Figure S2. Schematic representation of fluoromonomer production, adjusted from Hintzer et al., 2014.

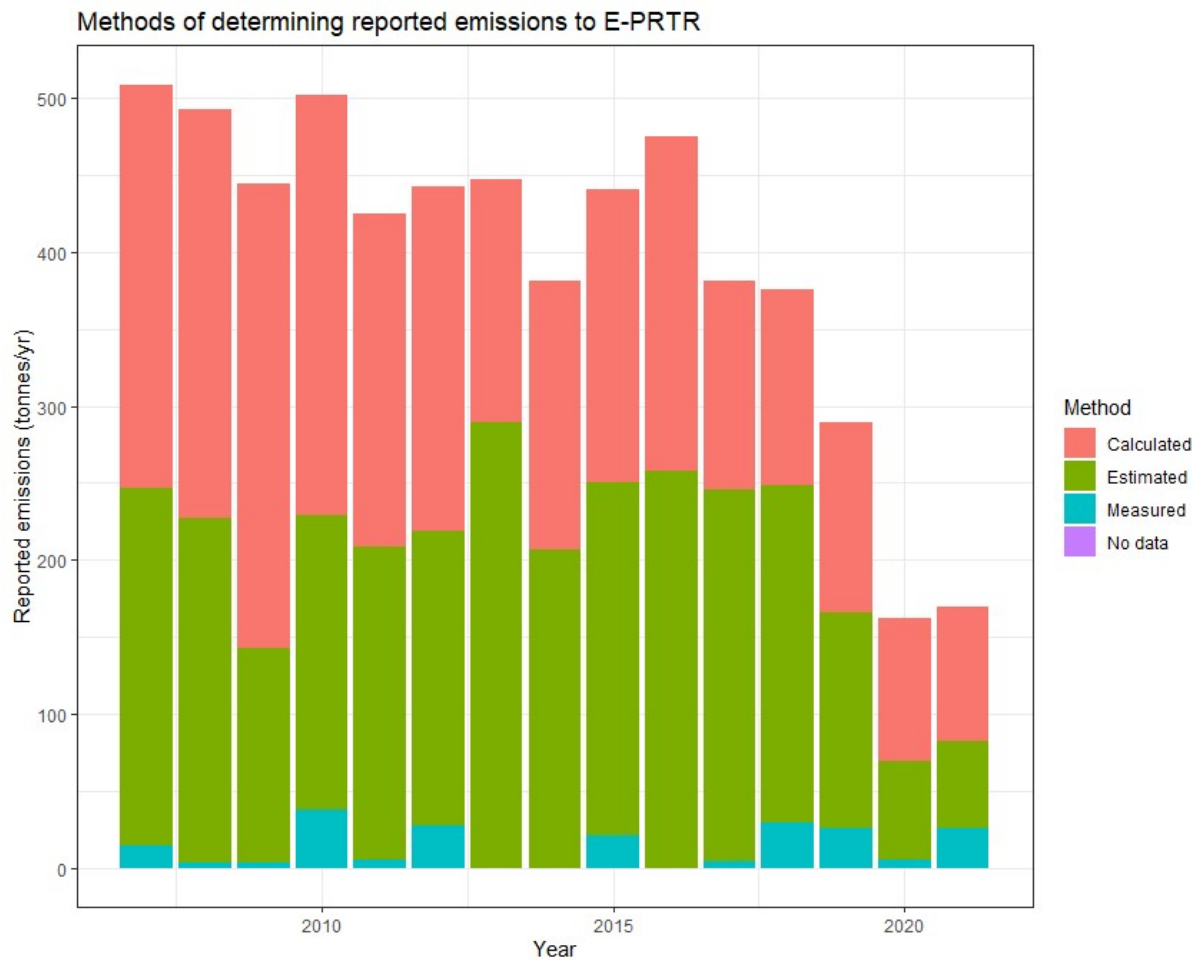

Figure S3. Amount of PFC, CFC, HFC and HCFC emissions reported to the E-PRTR of all fluoropolymer producers in this study per reporting year and the method of quantification.

Table S6. Reported emissions of HCFCs, HFCs, PFCs and CFCs by all European fluoropolymer producers to the E-PRTR in tonnes per year.

| Name           | Substance class | 2007  | 2008  | 2009  | 2010  | 2011  | 2012   | 2013  | 2014  | 2015  | 2016  | 2017  | 2018   | 2019   | 2020  | 2021  |
|----------------|-----------------|-------|-------|-------|-------|-------|--------|-------|-------|-------|-------|-------|--------|--------|-------|-------|
| AGC            | HCFCs           | 13.1  | 2.27  | 2.29  | 2.52  | 2.61  | 2.52   | 3.14  | 2.66  | 2.32  | 1.97  | 2.04  | 1.86   | 2.16   | 0     | 2.64  |
|                | HFCs            | 1.5   | 0.905 | 0.68  | 1.36  | 2.24  | 12.478 | 14.3  | 9.25  | 9.11  | 16.3  | 17.3  | 13.5   | 7.78   | 0     | 9.73  |
|                | PFCs            | 0     | 0     | 0     | 0     | 0     | 12.478 | 14.3  | 9.25  | 9.11  | 16.3  | 17.3  | 13.5   | 7.78   | 0     | 9.73  |
| Arkema-Daikin  | CFCs            | 5.59  | 4.22  | 2.17  | 0.434 | 0.013 | 0.019  | 0.117 | 0.045 | 0.011 | 0.062 | 0.016 | 0.152  | 0.066  | 0.06  | 0.069 |
|                | HCFCs           | 61.6  | 42.8  | 30.7  | 51.4  | 40.9  | 36.8   | 45.4  | 35.8  | 43.2  | 43.8  | 31.4  | 34.9   | 23.7   | 36    | 21    |
|                | HFCs            | 39.5  | 61.7  | 46.7  | 33.9  | 22.9  | 21.3   | 16.7  | 24.3  | 41.7  | 54.3  | 40.3  | 29.1   | 26.2   | 18.5  | 11.5  |
| Chemours       | CFCs            | 8.62  | 6.28  | 20.2  | 8.83  | 9.19  | 3.13   | 3.61  | 1.2   | 2.6   | 20.6  | 5.06  | 20.7   | 10.5   | 2.46  | 4.63  |
|                | HCFCs           | 104   | 126   | 120   | 121   | 105   | 126    | 96.1  | 76.5  | 85.9  | 83.5  | 45.9  | 17.3   | 26.5   | 21.7  | 22.1  |
|                | HFCs            | 31    | 24.4  | 70.1  | 67.7  | 23.3  | 25.3   | 23    | 8.53  | 15.3  | 12.4  | 9.12  | 17.8   | 35     | 14.1  | 27.4  |
|                | PFCs            | 0.943 | 0     | 0.206 | 0.576 | 0.212 | 0.402  | 0     | 0     | 0     | 0.272 | 0     | 0.654  | 0      | 0     | 0     |
| Dyneon         | CFCs            | 0.12  | 0     | 0     | 0     | 0     | 0      | 0     | 0     | 0     | 0     | 0     | 0      | 0      | 0     | 0     |
|                | HCFCs           | 0     | 0.029 | 0.023 | 0.026 | 0.026 | 0.036  | 0.015 | 0.015 | 0.016 | 0.015 | 0.016 | 0.023  | 0.018  | 0.016 | 0.225 |
|                | HFCs            | 0     | 0     | 0     | 0     | 0     | 0      | 0     | 0     | 0     | 0.231 | 0.234 | 0.231  | 0.198  | 0.14  | 0.138 |
| Solvay-Solexis | HCFCs           | 17.3  | 17.2  | 11.7  | 23.5  | 13.9  | 11.4   | 1.57  | 3.32  | 0     | 0     | 3.64  | 2.35   | 3.16   | 2.26  | 1.37  |
|                | HFCs            | 2.88  | 1.67  | 3.27  | 1.9   | 1.74  | 2.68   | 1.22  | 3.19  | 1.99  | 2.39  | 4.782 | 4.583  | 6.78   | 3.202 | 2.848 |
| Solvay SP      | HCFCs           | 11.4  | 4.77  | 4.46  | 8.57  | 7.12  | 5.62   | 13.6  | 13.7  | 16.5  | 16.8  | 16.1  | 4.209  | 4.516  | 4.931 | 4.912 |
|                | HFCs            | 1.62  | 0.6   | 2.11  | 4.5   | 1.21  | 0.9    | 1.07  | 3.29  | 3.27  | 4.21  | 27.4  | 10.887 | 17.548 | 2.547 | 11.67 |
|                | PFCs            | 210   | 200   | 130   | 176   | 195   | 182    | 213   | 190   | 210   | 202   | 161   | 204.5  | 117.7  | 56.5  | 39.4  |
|                | CFCs            | 0     | 0     | 0     | 0     | 0.172 | 0.095  | 0.1   | 0.09  | 0.07  | 0.09  | 0.094 | 0.08   | 0.08   | 0.084 | 0.041 |
